# Supplementary material
Source: Elsevier journal article supplement (https://www.sciencedirect.com/science/article/pii/S0034709420303676)
Supplement: mmc1 [file S0034709420303676:mmc1.docx]

**Figura suplementar S1** Teste de Kolmogorov-Smirnov para volume de perda sanguínea. Quaisquer variáveis, inclusive antes e após transformação, usando raiz, raiz cúbica e log não apresentaram distribuição normal. Os valores de *p* são os seguintes: antes da transformação (*p* < 0,001), transformação para raiz (*p* < 0,001), transformação para raiz cúbica (*p* = 0,001) e transformação para log (*p* < 0,004).

**Figura Suplementar S2** Teste de Kolmogorov-Smirnov para a área sob pressão arterial média intraoperatória < 65 mmHg. Única variável após a transformação para raiz cúbica que apresentou distribuição normal. Os valores de *p* são os seguintes: antes da transformação (*p* < 0,001), transformação para raiz (*p* < 0,001), transformação para raiz cúbica (*p* = 0,2) e transformação para log (*p* = 0,003).
